# Supplementary material for: Photo-regulation of constitutive gene expression in living cells by using ultrafast photo-cross-linking oligonucleotides
Source: Royal Society of Chemistry journal article supplement (doi:10.1039/c4bm00117f), 2014-01-01
Supplement: c4bm00117f1.pdf [file c4bm00117f1.pdf]

## Supplementary Information

### **Photo-regulation of Constitutive Gene Expression in Living Cells by Using of Ultrafast Photo-cross-linking Oligonucleotides**

*Takashi Sakamoto, Atsuo Shigeno, Yuichi Ohtaki, and Kenzo Fujimoto\**

## Experimental Procedures

**Preparation of oligonucleotides:** Oligoribonucleotides were purchased from Fasmac (Japan). Phosphorothioate oligodeoxyribonucleotides were synthesized by an automatic DNA synthesizer (3400 DNA synthesizer, Applied BioSystems) and purified by a reversed-phase HPLC (JASCO PU-980, HG-980-31, DG-980-50, UV-970 system equipped with an InertSustain<sup>TM</sup> C18 column (GL Science, 5  $\mu$ m, 10  $\times$  150 mm)). Preparation of oligonucleotides was confirmed by MALDI-TOF-MS (see Supporting Information Table S2). Phosphoramidite of <sup>CNV</sup>K was synthesized according to a method described in the literature.<sup>1</sup>

**Cell culture and transfection of AS-ODNs and siRNA:** GFP stable cell line (GFP-HeLa) was purchased from Cell Biolabs, Inc. (CA, USA). Cells were cultured in Dulbecco's MEM (10% fetal bovine serum, 100 U/ml penicillin, 100  $\mu$ g/ml streptomycin) in a humidified chamber (37°C, 5% CO<sub>2</sub>). Cells were trypsinized and resuspended in Opti-MEM without antibiotics and transferred to 96-well plate at a density of  $2 \times 10^4$  cells per well in a volume of 100  $\mu$ l and incubate for 24 h (37°C, 5% CO<sub>2</sub>) before antisense treatment. Transfection of K-ASs was carried out using Lipofectamine RNAi Max (Invitrogen) according to the manufacture's procedure. After the transfection, cells were cultured in Dulbecco's MEM (10% fetal bovine serum, 100 U/ml penicillin, 100  $\mu$ g/ml streptomycin) and in a humidified chamber (37°C, 5% CO<sub>2</sub>).

**Photoirradiation:** Before the photoirradiation, cell culture medium was replaced to PBS. Photoirradiation was performed by a UV-LED light source (1600 mW/cm<sup>2</sup>, Z-UV, OMRON, Japan). After the photoirradiation, cell culture medium was replaced to Dulbecco's MEM (10% fetal bovine serum, 100 U/ml penicillin, 100  $\mu$ g/ml streptomycin) and then cultured in a humidified chamber (37°C, 5% CO<sub>2</sub>).

**Quantification of mRNA:** Two hours after the photoirradiation, total RNA was extracted using CellAmp<sup>TM</sup> Direct RNA Prep Kit (Takara, Japan) and reverse transcription was

performed by the PrimeScript® RT reagent Kit (Takara, Japan) according to the manufacturer's procedure. Resulting cDNA was subjected to real-time PCR using an automated real-time PCR system (Smart Cycler®, Takara, Japan) with SYBR Premix Ex Taq II perfect real time (Takara, Japan) and 0.4 μM of primers (For GFP: forward; ATGGTGAGCAAGGGCGAG, reverse; GTGGTGCAGATGAACTTC (for AS-a), forward; CAACAGCCACAACGTCTATATC, reverse; AACTCCAGCAGGACCATGTGAT (for AS-b,c,d), For β-actin: forward; CTGGCACCACCTTCTACA, reverse; AGCACAGCCTGGATAGCAAC, For SIN3B: forward; TTCAACAACGCCATCAGCTA, reverse; GGCAGGAACTGTCCAAACTC). Quantity of GFP, β-actin and SIN3B mRNA was estimated from the change in  $C_T$  values with the normalization using the amounts of GAPDH mRNA estimated from real-time RT-PCR with a GAPDH primer set (forward; CATGCCAGTGAGCTTCCCGTT, reverse; GTGGAGTCTACTGGCGTCTTC).

**Confocal laser scanning fluorescence microscopy:** After the transfection of AS-ODN, 10 sec of photoirradiation was performed and the cells were cultured for 24 h. Fluorescence image of the cells were obtained by a confocal laser-scanning microscope (C2Si, Nikon, Japan) with 488 nm laser excitation and 525 nm detection and 30 μm pinhole radius.

**Table S1.** Sequence and MALDI-TOF-MS analysis of the synthetic oligonucleotides using this study

| Name     | Target region | Sequences <sup>a</sup>                                                 | Calcd.<br>[(M+H) <sup>+</sup> ] | Found   |
|----------|---------------|------------------------------------------------------------------------|---------------------------------|---------|
| cORN-a   | 14 – 38       | <sup>3'</sup> <u>UGGU</u> GGGGCCAC <u>UUGUC</u> GAGGAGCG <sup>5'</sup> |                                 |         |
| AS-a     |               | <sup>5'</sup> ACCACCCCGGTGAACAGCTCCTCGC <sup>3'</sup>                  | 7913.73                         | 7913.48 |
| K-AS-a1  |               | <sup>5'</sup> AXCACCCCGGTGAACAGCTCCTCGC <sup>3'</sup>                  | 8020.77                         | 8020.51 |
| K-AS-a2  |               | <sup>5'</sup> ACCACCCCGGTGAXCAGCTCCTCGC <sup>3'</sup>                  | 7996.76                         | 7997.45 |
| K-AS-a3  |               | <sup>5'</sup> ACCACXCCGGTGAACAGCTCCTCGC <sup>3'</sup>                  | 8020.77                         | 8018.87 |
| K-AS inv |               | <sup>5'</sup> CGCTCCTCGACAAGTGGCCCCACXA <sup>3'</sup>                  | 8020.77                         | 8019.69 |
| cORN-b   | 471 – 495     | <sup>3'</sup> <u>UCAAGUGGAACU</u> ACGGCAAGAAGAC <sup>5'</sup>          |                                 |         |
| AS-b     |               | <sup>5'</sup> AGTTCACCTTGATGCCGTTCTTCTG <sup>3'</sup>                  | 7995.72                         | 7996.88 |
| K-AS-b1  |               | <sup>5'</sup> AXTTCACCTTGATGCCGTTCTTCTG <sup>3'</sup>                  | 8037.74                         | 8037.41 |
| K-AS-b2  |               | <sup>5'</sup> AGTTCACCTTGAXGCCGTTCTTCTG <sup>3'</sup>                  | 8062.75                         | 8063.08 |
| cORN-c   | 542 – 566     | <sup>3'</sup> <u>UACCCCAACAAGACGACCAUCACCA</u> <sup>5'</sup>           |                                 |         |
| AS-c     |               | <sup>5'</sup> ATGGGGGTGTTCTGCTGGTAGTGGT <sup>3'</sup>                  | 8211.74                         | 8216.00 |
| K-AS-c1  |               | <sup>5'</sup> AXGGGGGTGTTCTGCTGGTAGTGGT <sup>3'</sup>                  | 8303.78                         | 8300.48 |
| cORN-d   | 592 – 616     | <sup>3'</sup> <u>UGACCCACGAGUCCAUCACCAACAG</u> <sup>5'</sup>           |                                 |         |
| AS-d     |               | <sup>5'</sup> ACTGGGTGCTCAGGTAGTGGTTGTC <sup>3'</sup>                  | 8140.74                         | 8140.82 |
| K-AS-d1  |               | <sup>5'</sup> AXTGGGTGCTCAGGTAGTGGTTGTC <sup>3'</sup>                  | 8247.78                         | 8247.92 |
| K-AS-d2  |               | <sup>5'</sup> ACTGGGTGCTCAXGTAGTGGTTGTC <sup>3'</sup>                  | 8207.77                         | 8209.54 |

<sup>a</sup> “X” and under bar indicate <sup>CNV</sup>K and photo-cross-linking site, respectively.

**Table S2.** Melting temperature ( $T_M$ ) of K-ASs with its complementary ORNs.<sup>a</sup>

| Duplex          | $T_M / ^\circ\text{C}$ | Duplex         | $T_M / ^\circ\text{C}$ | Duplex         | $T_M / ^\circ\text{C}$ |
|-----------------|------------------------|----------------|------------------------|----------------|------------------------|
| AS-a/cORN-a     | 69.4 ± 0.6             | AS-b/cORN-b    | 55.6 ± 0.6             | AS-d/cORN-d    | 59.3 ± 0.6             |
| K-AS-a1/cORN-a  | 67.0 ± 0.5             | K-AS-b1/cORN-b | 52.3 ± 0.4             | K-AS-d1/cORN-d | 58.6 ± 0.4             |
| K-AS-a2/cORN-a  | 64.5 ± 0.5             | K-AS-b2/cORN-b | 51.1 ± 0.4             | K-AS-d2/cORN-d | 57.6 ± 0.6             |
| K-AS-a 3/cORN-a | 65.8 ± 0.8             | AS-c/cORN-c    | 67.3 ± 0.0             |                |                        |
| K-AS inv/cORN-a | n.d. <sup>b</sup>      | K-AS-c1/cORN-c | 65.4 ± 0.3             |                |                        |

<sup>a</sup> $T_M$  values were determined from UV melting curves of the duplex ([Duplex] = 0.5  $\mu\text{M}$  in 50 mM sodium cacodylate (pH 7.4) containing 100 mM NaCl). <sup>b</sup>Not determined.

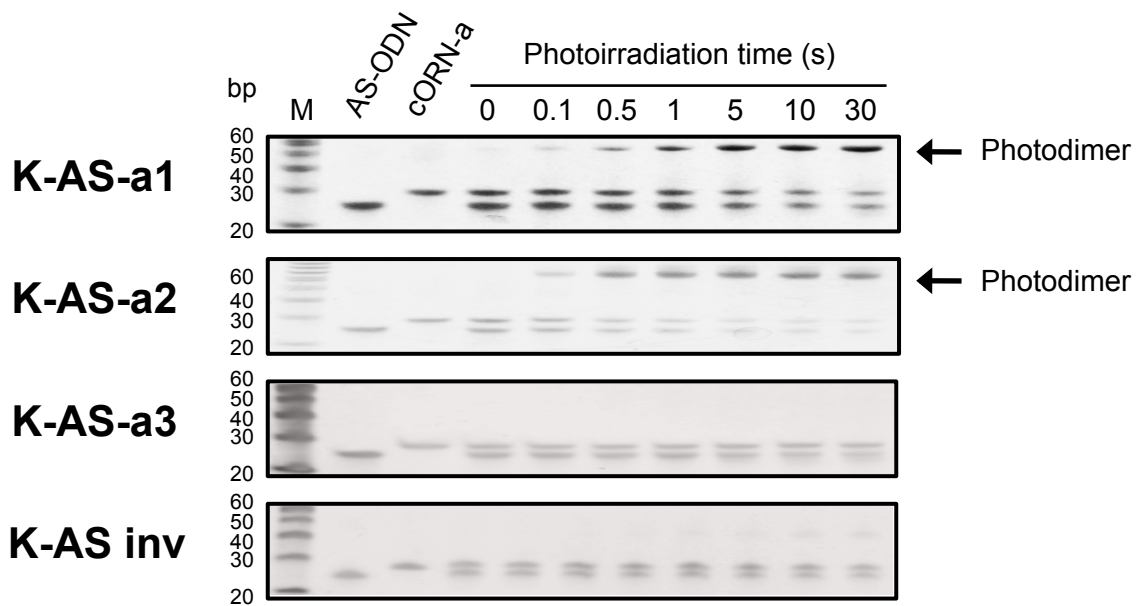

**Figure S1.** Denaturing PAGE analysis of the photo-cross-linking reaction of K-AS-a1, -a2, -a3 and inv with cORN-a. PAGE analyses were performed on 15% polyacrylamide gel containing 7M urea and 25% formamide. “M” indicates 10 bp ladder marker. Hetero-duplexes ( [AS-ODN] = [cORN] = 2  $\mu$ M in PBS) were irradiated (366 nm) at 37°C.

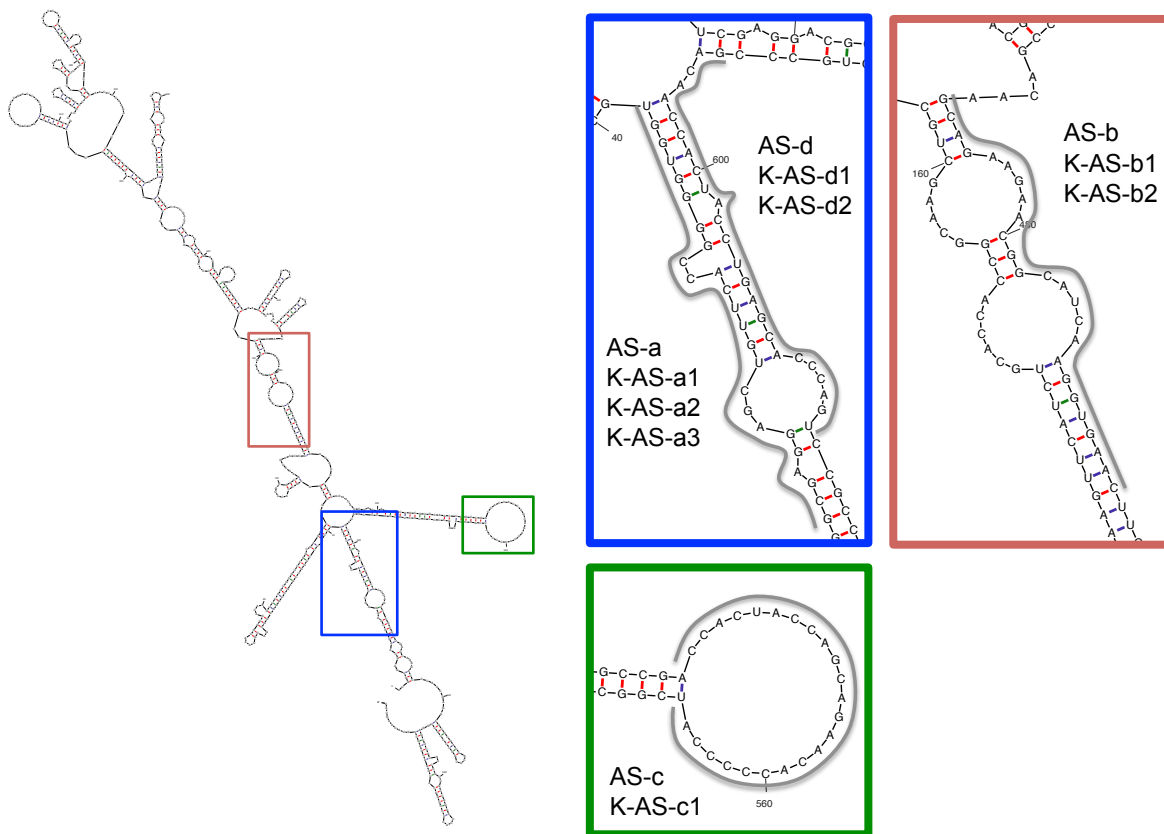

**Figure S2.** Secondary structure of GFP mRNA calculated by mfold<sup>2</sup> and the target site of the AS-ODNs.

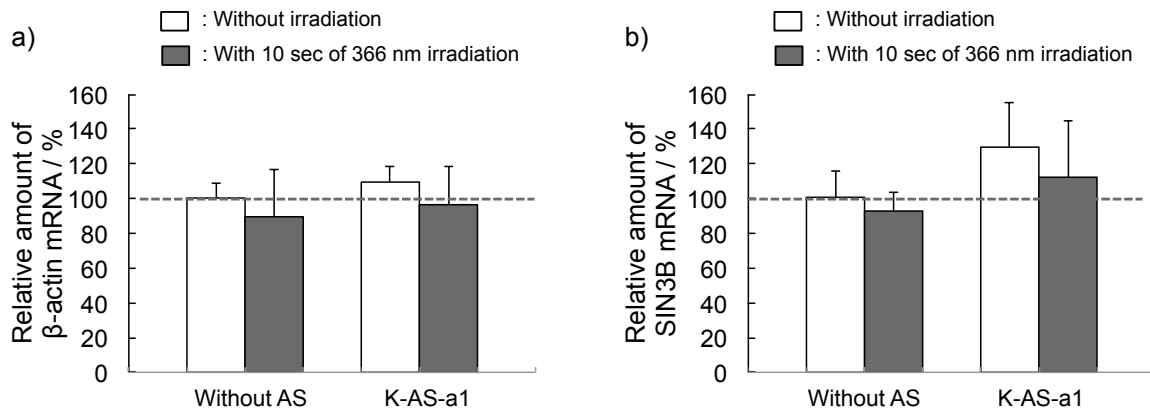

**Figure S3.** Relative amount of  $\beta$ -actin (a) and SIN3B (b) mRNA in GFP-HeLa cells before and after the photoirradiation with K-AS-a1 treatment ([antisense] = 100 nM, photoirradiation: 366 nm, 10 sec)



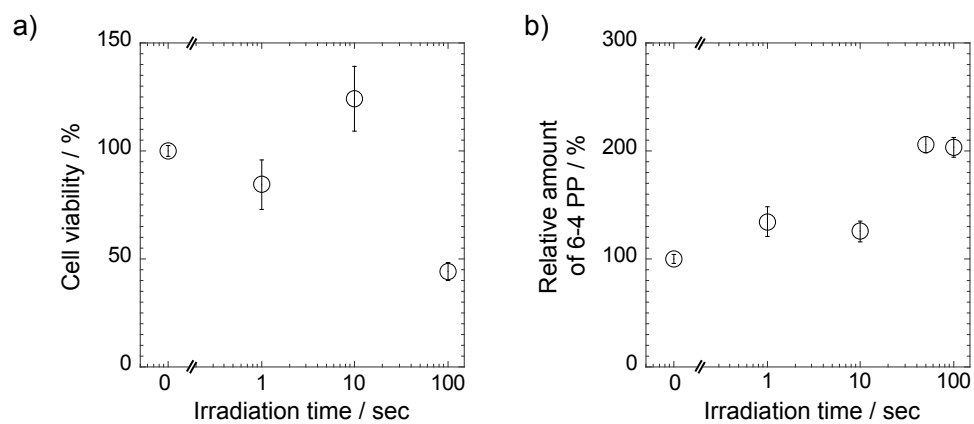

**Figure S4.** Cell viability (a) and relative amount of pyrimidine (6-4) pyrimidone photoproducts (6-4 PP) (b) in GFP-HeLa cells as a function of irradiation time. Cell viability was estimated by WST-1 assay 48 h after the photoirradiation. The amount of 6-4 PP was measured by ELISA kit (Cell Biolabs, CA) 48 h after the photoirradiation according to a manufacture's protocol.

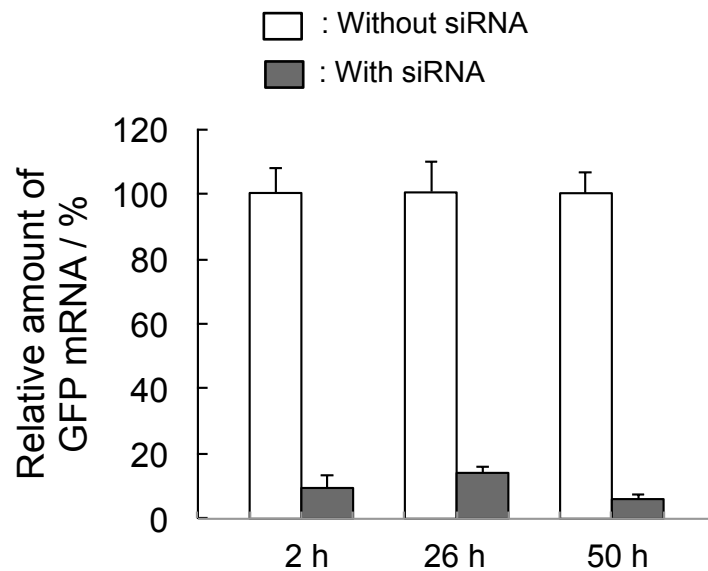

**Figure S5.** Relative amount of GFP mRNA in GFP-HeLa cells after the treatment of siRNA targeting GFP mRNA ([siRNA] = 100 nM, siRNA (sense); 5'-GCAAGCUGACCCUGAAGUUCA U-3', siRNA (antisense); 5'-GAACUUCAGGGUCAGCUUGCCG-3')

### References

1. Y. Yoshimura, K. Fujimoto, *Org. Lett.*, 2008, **10**, 3227.
2. M. Zuker, *Nucleic Acids Res.*, 2003, **31**, 3406.
